# Supplementary material for: Tephra fall impacts to buildings: the 2017–2018 Manaro Voui eruption, Vanuatu
Source: Frontiers journal article supplement (doi:10.3389/feart.2024.1392098), 2024-08-15
Supplement: Table_1.XLSX [file Table_1.XLSX]

## Sheet: Sheet1
BuildingID	Survey No#	Village	Construction code	Construction classification	Primary event Causing damage	Hazard Intensity Metric (range, in mm)	Damage State
1	2	Red Cliffs	Nb	Modern - R/Bblock	March/April	>175	DS0
2	2	Red Cliffs	Xw	Mixed wall construction	March/April	>175	DS0
3	2	Red Cliffs	Nt	Modern - Timber	March/April	>175	DS0
4	2	Red Cliffs	Xw	Mixed wall construction	March/April	>175	DS0
5	2	Red Cliffs	Nb	Modern - R/Bblock	March/April	>175	DS0
6	2	Red Cliffs	Ts	Traditional - Short span	March/April	>175	DS0
7	2	Red Cliffs	Ts	Traditional - Short span	March/April	>175	DS5
8	2	Red Cliffs	Xw	Mixed wall construction	March/April	>175	DS0
9	2	Red Cliffs	Ts	Traditional - Short span	March/April	>175	DS5
10	2	Red Cliffs	Nb	Modern - R/Bblock	March/April	>175	DS0
11	2	Red Cliffs	Nb	Modern - R/Bblock	March/April	>175	DS0
12	2	Red Cliffs	Ts	Traditional - Short span	March/April	>175	DS5
13	2	Red Cliffs	Ts	Traditional - Short span	March/April	>175	DS0
14	2	Red Cliffs	Xw	Mixed wall construction	March/April	>175	DS0
15	2	Red Cliffs	Ts	Traditional - Short span	March/April	>175	DS0
16	2	Red Cliffs	Nb	Modern - R/Bblock	March/April	>175	DS1
17	2	Red Cliffs	Xw	Mixed wall construction	March/April	>175	DS0
18	2	Red Cliffs	Nb	Modern - R/Bblock	March/April	>175	DS0
19	2	Red Cliffs	Xw	Mixed wall construction	March/April	>175	DS0
20	2	Red Cliffs	Ts	Traditional - Short span	March/April	>175	DS5
21	2	Red Cliffs	Ts	Traditional - Short span	March/April	>175	DS1
22	2	Red Cliffs	Xw	Mixed wall construction	March/April	>175	DS0
23	2	Red Cliffs	Nb	Modern - R/Bblock	March/April	>175	DS0
24	2	Red Cliffs	Nb	Modern - R/Bblock	March/April	>175	DS0
25	2	Red Cliffs	Nc	Modern - RC Pillar	March/April	>175	DS0
26	2	Navuturiki Village	Nt	Modern - Timber	March/April	<25	DS0
27	2	Katambolo Village	Xw	Mixed wall construction	March/April	<25	DS0
28	2	Katambolo Village	Nb	Modern - R/Bblock	March/April	<25	DS0
30	2		Nb	Modern - R/Bblock	March/April	<25	DS0
31	2	Walaha	Nb	Modern - R/Bblock	March/April	<25	DS0
32	2		Nb	Modern - R/Bblock	March/April	25-50	DS0
33	2		Nb	Modern - R/Bblock	March/April	25-50	DS1
34	2		Nb	Modern - R/Bblock	March/April	25-50	DS0
35	2		Xw	Mixed wall construction	March/April	25-50	DS0
36	2		Nt	Modern - Timber	March/April	25-50	DS0
37	2	Ngduidui Village	Xw	Mixed wall construction	March/April	25-50	DS0
38	2	Ngduidui Village	Xw	Mixed wall construction	March/April	25-50	DS0
39	2	Lolobinanungwe	Xw	Mixed wall construction	March/April	50-75	DS0
40	2	Lolobinanungwe	X2	Trad. wall, Mod. roof	March/April	50-75	DS0
41	2	Lolobinanungwe	Ts	Traditional - Short span	March/April	50-75	DS0
42	2	Lolobinanungwe	Ts	Traditional - Short span	March/April	50-75	DS0
43	2	Lolobinanungwe	Ts	Traditional - Short span	March/April	50-75	DS0
44	2	Lolobinanungwe	Xw	Mixed wall construction	March/April	50-75	DS0
45	2	Lolobinanungwe	Ts	Traditional - Short span	March/April	50-75	DS1
46	2	Lolobinanungwe	Ts	Traditional - Short span	March/April	50-75	DS0
47	2	Lolobinanungwe	Ts	Traditional - Short span	March/April	50-75	DS0
48	2	Lolobinanungwe	Ts	Traditional - Short span	March/April	50-75	DS0
49	2	Lolobinanungwe	Ts	Traditional - Short span	March/April	50-75	DS0
50	2	Lolobinanungwe	Ts	Traditional - Short span	March/April	50-75	DS0
51	2	Lolobinanungwe	Nt	Modern - Timber	March/April	50-75	DS0
52	2	Lolobinanungwe	Ts	Traditional - Short span	March/April	50-75	DS1
53	2		Nt	Modern - Timber	March/April	25-50	DS1
54	2		Nt	Modern - Timber	March/April	25-50	DS1
55	2		Nb	Modern - R/Bblock	March/April	25-50	DS0
56	2		Nb	Modern - R/Bblock	March/April	25-50	DS0
57	2		Ts	Traditional - Short span	March/April	25-50	DS1
58	2		Ts	Traditional - Short span	March/April	25-50	DS0
59	2		X2	Trad. wall, Mod. roof	March/April	25-50	DS0
60	2	Debris flow	Nb	Modern - R/Bblock	March/April	<25	DS0
61	2	Debris flow	Nb	Modern - R/Bblock	March/April	<25	DS0
62	2	Debris flow	Nb	Modern - R/Bblock	March/April	<25	DS0
63	2	Debris flow	Nb	Modern - R/Bblock	March/April	<25	DS0
64	2	Debris flow	Nt	Modern - Timber	March/April	<25	DS0
65	2	Debris flow	Nb	Modern - R/Bblock	March/April	<25	DS0
66	2	Debris flow	Ts	Traditional - Short span	March/April	<25	DS0
67	2	Debris flow	Xw	Mixed wall construction	March/April	<25	DS0
68	2	Debris flow	Ts	Traditional - Short span	March/April	<25	DS0
69	2	Debris flow	Ts	Traditional - Short span	March/April	<25	DS0
70	2	Debris flow	Nt	Modern - Timber	March/April	<25	DS0
71	2	Debris flow	Nb	Modern - R/Bblock	March/April	<25	DS0
72	2	Debris flow	Nt	Modern - Timber	March/April	<25	DS0
73	2	Debris flow	Nb	Modern - R/Bblock	March/April	<25	DS0
74	2	Debris flow	Nb	Modern - R/Bblock	March/April	<25	DS0
75	2	Debris flow	Nb	Modern - R/Bblock	March/April	<25	DS0
76	2	Debris flow	Ts	Traditional - Short span	March/April	<25	DS0
77	2	Catholic Mission	Nb	Modern - R/Bblock	March/April	25-50	DS0
78	2	Catholic Mission	Nb	Modern - R/Bblock	March/April	25-50	DS0
79	2	Catholic Mission	Nb	Modern - R/Bblock	March/April	25-50	DS1
80	2	Catholic Mission	Nb	Modern - R/Bblock	March/April	25-50	DS1
81	2	Catholic Mission	Nt	Modern - Timber	March/April	25-50	DS0
82	2	Catholic Mission	Nb	Modern - R/Bblock	March/April	25-50	DS1
83	2	Catholic Mission	Nb	Modern - R/Bblock	March/April	25-50	DS0
84	2	Catholic Mission	Nt	Modern - Timber	March/April	25-50	DS0
85	2	Catholic Mission	Nt	Modern - Timber	March/April	25-50	DS0
86	2	Catholic Mission	Nt	Modern - Timber	March/April	25-50	DS0
87	2	Catholic Mission	Nb	Modern - R/Bblock	March/April	25-50	DS1
88	2	Catholic Mission	Nb	Modern - R/Bblock	March/April	25-50	DS0
89	2	Catholic Mission	Xw	Mixed wall construction	March/April	25-50	DS0
90	2	Catholic Mission	Nb	Modern - R/Bblock	March/April	25-50	DS0
91	2	Catholic Mission	Nb	Modern - R/Bblock	March/April	25-50	DS0
92	2	Catholic Mission	Nb	Modern - R/Bblock	March/April	25-50	DS1
93	2	Catholic Mission	Nb	Modern - R/Bblock	March/April	25-50	DS0
94	2	Catholic Mission	Nb	Modern - R/Bblock	March/April	25-50	DS0
95	2	Catholic Mission	Nb	Modern - R/Bblock	March/April	25-50	DS1
96	2	Catholic Mission	Nb	Modern - R/Bblock	March/April	25-50	DS0
97	2	Catholic Mission	Xw	Mixed wall construction	March/April	25-50	DS1
98	2	Catholic Mission	Nb	Modern - R/Bblock	March/April	25-50	DS0
99	2	Catholic Mission	Nb	Modern - R/Bblock	March/April	25-50	DS0
100	2	Catholic Mission	Nb	Modern - R/Bblock	March/April	25-50	DS1
101	2	Catholic Mission	Nt	Modern - Timber	March/April	25-50	DS0
102	2	Catholic Mission	Nb	Modern - R/Bblock	March/April	25-50	DS3
103	2	Catholic Mission	Nb	Modern - R/Bblock	March/April	25-50	DS0
104	2		Nt	Modern - Timber	March/April	25-50	DS0
105	2		X2	Trad. wall, Mod. roof	March/April	25-50	DS3
106	2	Catholic Mission	Ts	Traditional - Short span	March/April	25-50	DS2
107	2	Catholic Mission	Ts	Traditional - Short span	March/April	25-50	DS4
108	2	Catholic Mission	Nb	Modern - R/Bblock	March/April	25-50	DS0
109	2		X2	Trad. wall, Mod. roof	March/April	25-50	DS0
110	2		Ts	Traditional - Short span	March/April	25-50	DS0
111	2		Ts	Traditional - Short span	March/April	25-50	DS0
112	2		Ts	Traditional - Short span	March/April	25-50	DS5
113	2		Ts	Traditional - Short span	March/April	25-50	DS5
114	2	World vision	Nc	Modern - RC Pillar	March/April	<25	DS1
115	2	World vision	Xw	Mixed wall construction	March/April	<25	DS1
116	2	Saratamata	Nb	Modern - R/Bblock	March/April	<25	DS0
117	2	Saratamata	Nc	Modern - RC Pillar	March/April	<25	DS0
118	2	Saratamata	Nb	Modern - R/Bblock	March/April	<25	DS0
119	2	Saratamata	Nb	Modern - R/Bblock	March/April	<25	DS0
120	2	Saratamata	Nb	Modern - R/Bblock	March/April	<25	DS0
121	2	Saratamata	Nb	Modern - R/Bblock	March/April	<25	DS0
123	2	Longana	Nb	Modern - R/Bblock	March/April	<25	DS0
124	2		Ts	Traditional - Short span	March/April	<25	DS0
125	2	Ambae Bulu	Nc	Modern - RC Pillar	March/April	<25	DS0
126	2	Ambae Bulu	Nb	Modern - R/Bblock	March/April	<25	DS0
127	2	Ambae Bulu	Nb	Modern - R/Bblock	March/April	<25	DS0
128	2	Ambae Bulu	Nb	Modern - R/Bblock	March/April	<25	DS0
129	2	Ambae Bulu	Nb	Modern - R/Bblock	March/April	<25	DS0
130	2	Ambae Bulu	Nb	Modern - R/Bblock	March/April	<25	DS0
131	2		Nb	Modern - R/Bblock	March/April	<25	DS0
132	2		Nb	Modern - R/Bblock	March/April	<25	DS0
133	2		Ts	Traditional - Short span	March/April	25-50	DS0
134	1	Saragaimetue	Nt	Modern - Timber	March/April	50-75	DS1
135	1	Saragaimetue	Ts	Traditional - Short span	March/April	50-75	DS0
137	1	Saragaimetue	Nb	Modern - R/Bblock	March/April	50-75	DS1
138	1	Saragaimetue	Nt	Modern - Timber	March/April	50-75	DS1
139	1	Saragaimetue	Ts	Traditional - Short span	March/April	50-75	DS3
140	1	Saragaimetue	Ts	Traditional - Short span	March/April	50-75	DS5
141	1	Lolosori	Nb	Modern - R/Bblock	March/April	50-75	DS1
142	1	Lolosori	Nb	Modern - R/Bblock	March/April	50-75	DS1
143	1	Lolosori	Nb	Modern - R/Bblock	March/April	50-75	DS1
144	1	Lolosori	Nb	Modern - R/Bblock	March/April	50-75	DS1
145	1	Lolosori	Xw	Mixed wall construction	March/April	50-75	DS1
146	1	Lolosori	Nb	Modern - R/Bblock	March/April	50-75	DS1
147	1	Lolosori	Xw	Mixed wall construction	March/April	50-75	DS1
148	1	Lolosori	Ts	Traditional - Short span	March/April	50-75	DS0
149	1	Ambanga	Nb	Modern - R/Bblock	March/April	75-100	DS4
150	1	Ambanga	Nb	Modern - R/Bblock	March/April	75-100	DS1
151	1	Ambanga	Nb	Modern - R/Bblock	March/April	75-100	DS1
152	1	Ambanga	Nt	Modern - Timber	March/April	75-100	DS5
153	1	Ambanga	X2	Trad. wall, Mod. roof	March/April	75-100	DS5
154	1	Ambanga	X2	Trad. wall, Mod. roof	March/April	75-100	DS5
155	1	Ambanga	X2	Trad. wall, Mod. roof	March/April	75-100	DS5
156	1	Vingalato	Ts	Traditional - Short span	March/April	<25	DS0
157	1	Vingalato	Ts	Traditional - Short span	March/April	<25	DS1
158	3	Lovubanga	Ts	Traditional - Short span	July	150-175	DS5
159	3	Lovubanga	Ts	Traditional - Short span	July	150-175	DS2
160	3	Lovubanga	Xw	Mixed wall construction	July	150-175	DS4
161	3	Lovubanga	Ts	Traditional - Short span	July	150-175	DS1
162	3	Lovubanga	Ts	Traditional - Short span	July	150-175	DS5
163	3	Lovubanga	Ts	Traditional - Short span	July	150-175	DS1
164	3	Lovubanga	Ts	Traditional - Short span	July	150-175	DS2
165	3	Lovubanga	Ts	Traditional - Short span	July	150-175	DS5
166	3	Lovubanga	Nb	Modern - R/Bblock	July	150-175	DS0
167	3	Lovubanga	Ts	Traditional - Short span	July	150-175	DS5
168	3	Lovubanga	Ts	Traditional - Short span	July	150-175	DS5
169	3	Lovubanga	Ts	Traditional - Short span	July	150-175	DS5
170	3	Lovubanga	Ts	Traditional - Short span	July	150-175	DS5
171	3	Lovubanga	Ts	Traditional - Short span	July	150-175	DS5
172	3	Lovubanga	Ts	Traditional - Short span	July	150-175	DS5
173	3	Lovubanga	Nb	Modern - R/Bblock	July	150-175	DS0
174	3	Lovubanga	Xw	Mixed wall construction	July	150-175	DS3
175	3	Lovubanga	Ts	Traditional - Short span	July	150-175	DS3
176	3	South Lovubanga	Ts	Traditional - Short span	July	150-175	DS3
177	3	South Lovubanga	X2	Trad. wall, Mod. roof	July	150-175	DS2
178	3	South Lovubanga	Ts	Traditional - Short span	July	150-175	DS2
179	3	South Lovubanga	Ts	Traditional - Short span	July	150-175	DS5
180	3	South Sarabulu	Nb	Modern - R/Bblock	July	125-150	DS0
181	3	South Sarabulu	Nb	Modern - R/Bblock	July	125-150	DS0
182	3	South Sarabulu	Nb	Modern - R/Bblock	July	125-150	DS0
183	3	South Sarabulu	Ts	Traditional - Short span	July	125-150	DS1
184	3	South Sarabulu	Ts	Traditional - Short span	July	125-150	DS2
185	3	South Sarabulu	Ts	Traditional - Short span	July	125-150	DS5
186	3	Lolomangwe	Nb	Modern - R/Bblock	July	125-150	DS0
187	3	Lolomangwe	Xw	Mixed wall construction	July	125-150	DS0
188	3	Lolomangwe	Ts	Traditional - Short span	July	125-150	DS4
189	3	Lolomangwe	X2	Trad. wall, Mod. roof	July	150-175	DS0
190	3	Lolomangwe	Ts	Traditional - Short span	July	150-175	DS0
191	3	Lolomangwe	Ts	Traditional - Short span	July	150-175	DS5
192	3	Lolomangwe	Xw	Mixed wall construction	July	150-175	DS0
193	3	Lolomangwe	X1	Modern. walls, Trad. Roof	July	150-175	DS0
194	3	Lolomangwe	Ts	Traditional - Short span	July	150-175	DS5
195	3	Lolomangwe	Nb	Modern - R/Bblock	July	150-175	DS0
196	3	Lolomangwe	X2	Trad. wall, Mod. roof	July	125-150	DS0
197	3	South Lolovenue	Ts	Traditional - Short span	July	150-175	DS0
198	3	South Lolovenue	Ts	Traditional - Short span	July	150-175	DS0
199	3	South Lolovenue	Ts	Traditional - Short span	July	150-175	DS1
200	3	South Lolovenue	Ts	Traditional - Short span	July	150-175	DS0
201	3	South Lolovenue	Ts	Traditional - Short span	July	150-175	DS5
202	3	South Lolovenue	Ts	Traditional - Short span	July	150-175	DS5
203	3	South Lolovenue	Nt	Modern - Timber	July	150-175	DS1
204	3	South Lolovenue	Ts	Traditional - Short span	July	150-175	DS2
205	3	South Lolovenue	Ts	Traditional - Short span	July	150-175	DS3
206	3	South Lolovenue	Ts	Traditional - Short span	July	150-175	DS5
207	3	South Lolovenue	Ts	Traditional - Short span	July	150-175	DS5
208	3	South Lolovenue	Ts	Traditional - Short span	July	150-175	DS2
209	3		Ts	Traditional - Short span	July	150-175	DS0
210	3		X2	Trad. wall, Mod. roof	July	150-175	DS5
211	3		Ts	Traditional - Short span	July	150-175	DS0
212	3		Ts	Traditional - Short span	July	150-175	DS1
213	3		Ts	Traditional - Short span	July	150-175	DS1
214	3		Ts	Traditional - Short span	July	150-175	DS5
215	3		Ts	Traditional - Short span	July	150-175	DS3
216	3		Ts	Traditional - Short span	July	150-175	DS1
217	3		Ts	Traditional - Short span	July	150-175	DS5
218	3		Ts	Traditional - Short span	July	150-175	DS5
219	3		Ts	Traditional - Short span	July	150-175	DS5
221	3		Ts	Traditional - Short span	July	150-175	DS0
222	3		Ts	Traditional - Short span	July	150-175	DS2
223	3		Ts	Traditional - Short span	July	150-175	DS2
224	3	Kwari Maraka	Ts	Traditional - Short span	July	150-175	DS1
225	3	Kwari Maraka	Ts	Traditional - Short span	July	150-175	DS2
226	3	Kwari Maraka	Ts	Traditional - Short span	July	150-175	DS1
227	3	Kwari Maraka	Ts	Traditional - Short span	July	150-175	DS4
228	3	Lovunkevike	Nb	Modern - R/Bblock	July	150-175	DS0
229	3	Lovunkevike	Ts	Traditional - Short span	July	150-175	DS1
230	3	Lovunkevike	Ts	Traditional - Short span	July	150-175	DS1
231	3	Lovunkevike	Ts	Traditional - Short span	July	150-175	DS5
232	3	Sakao	Nb	Modern - R/Bblock	July	125-150	DS0
233	3	Sakao	Ts	Traditional - Short span	July	125-150	DS5
234	3	Sakao	Ts	Traditional - Short span	July	125-150	DS1
235	3	Sakao	Ts	Traditional - Short span	July	125-150	DS5
236	3	Sakao	Nb	Modern - R/Bblock	July	125-150	DS0
237	3	Sakao	Ts	Traditional - Short span	July	125-150	DS1
238	3	Sakao	To	Traditional - Shower/toilet	July	125-150	DS1
239	3	Sakao	Ts	Traditional - Short span	July	125-150	DS1
240	3	Sakao	Ts	Traditional - Short span	July	125-150	DS1
241	3	Sakao	Ts	Traditional - Short span	July	125-150	DS0
242	3	Sakao	Ts	Traditional - Short span	July	125-150	DS1
243	3	Sakao	Ts	Traditional - Short span	July	125-150	DS2
244	3	Sakao	Nb	Modern - R/Bblock	July	125-150	DS0
245	3	Sakao	Nt	Modern - Timber	July	125-150	DS0
246	3	Sakao	Nb	Modern - R/Bblock	July	125-150	DS0
247	3	Sakao	Xw	Mixed wall construction	July	125-150	DS0
248	3	Sakao	Ts	Traditional - Short span	July	125-150	DS1
249	3	Sakao	Ts	Traditional - Short span	July	125-150	DS1
250	3	Sakao	Nb	Modern - R/Bblock	July	125-150	DS0
251	3	Sakao	Nb	Modern - R/Bblock	July	125-150	DS0
252	3	Sakao	Ts	Traditional - Short span	July	125-150	DS5
253	3	Sakao	Nb	Modern - R/Bblock	July	125-150	DS0
254	3	Sakao	Xw	Mixed wall construction	July	125-150	DS5
255	3	Sakao	Xw	Mixed wall construction	July	125-150	DS2
256	3	Sakao	Nb	Modern - R/Bblock	July	125-150	DS2
257	3	Sakao	Xw	Mixed wall construction	July	125-150	DS3
258	3	Sakao	Xw	Mixed wall construction	July	125-150	DS3
259	3	Sakao	Ts	Traditional - Short span	July	125-150	DS0
260	3	Sakao	Ts	Traditional - Short span	July	100-125	DS0
261	3	Sakao	Ts	Traditional - Short span	July	100-125	DS1
262	3	Sakao	Ts	Traditional - Short span	July	100-125	DS1
263	3	Sakao	Ts	Traditional - Short span	July	100-125	DS1
264	3	Sakao	Xw	Mixed wall construction	July	100-125	DS5
265	3	Sakao	Ts	Traditional - Short span	July	100-125	DS2
266	3	Sakao	Nb	Modern - R/Bblock	July	100-125	DS0
267	3	Sakao	Ts	Traditional - Short span	July	100-125	DS5
268	3	Sakao	Ts	Traditional - Short span	July	100-125	DS1
269	3	Sakao	Ts	Traditional - Short span	July	125-150	DS0
270	3	Sakao	Ts	Traditional - Short span	July	125-150	DS1
271	3	Sakao	Ts	Traditional - Short span	July	125-150	DS5
272	3	Sakao	Ts	Traditional - Short span	July	125-150	DS0
273	3	Sakao	Ts	Traditional - Short span	July	125-150	DS1
274	3	Sakao	Ts	Traditional - Short span	July	125-150	DS4
275	3	Sakao	Ts	Traditional - Short span	July	125-150	DS0
276	3	Sakao	Ts	Traditional - Short span	July	125-150	DS1
277	3	Loureure	Ts	Traditional - Short span	July	100-125	DS1
278	3	Loureure	Ts	Traditional - Short span	July	100-125	DS1
279	3	Loureure	Ts	Traditional - Short span	July	100-125	DS1
280	3	Loureure	Ts	Traditional - Short span	July	100-125	DS1
281	3	Loureure	Ts	Traditional - Short span	July	100-125	DS1
282	3		Xw	Mixed wall construction	July	75-100	DS0
283	3		Ts	Traditional - Short span	July	75-100	DS3
283	3		Ts	Traditional - Short span	July	<25	DS3
284	3		To	Traditional - Shower/toilet	July	75-100	DS0
285	3		Ts	Traditional - Short span	July	75-100	DS0
286	3		Ts	Traditional - Short span	July	100-125	DS1
287	3		Ts	Traditional - Short span	July	75-100	DS5
288	3		Ts	Traditional - Short span	July	75-100	DS2
289	3		Ts	Traditional - Short span	July	75-100	DS1
290	3		Ts	Traditional - Short span	July	75-100	DS5
291	3		Ts	Traditional - Short span	July	75-100	DS1
292	3		To	Traditional - Shower/toilet	July	75-100	DS0
293	3		Ts	Traditional - Short span	July	75-100	DS1
294	3		Ts	Traditional - Short span	July	75-100	DS5
295	3		Ts	Traditional - Short span	July	75-100	DS0
296	3		Ts	Traditional - Short span	July	75-100	DS0
297	3	Lolovitali	Nb	Modern - R/Bblock	July	75-100	DS0
298	3	Lolovitali	Xw	Mixed wall construction	July	75-100	DS2
299	3	Lolovitali	Ts	Traditional - Short span	July	75-100	DS1
300	3	Lolovitali	X1	Modern. walls, Trad. Roof	July	75-100	DS1
301	3	Lolovitali	Nt	Modern - Timber	July	75-100	DS0
302	3	Lolovitali	Xw	Mixed wall construction	July	75-100	DS0
303	3	Lolovitali	Ts	Traditional - Short span	July	75-100	DS1
304	3	Lolovitali	Nt	Modern - Timber	July	75-100	DS0
305	3	Lolovitali	Ts	Traditional - Short span	July	75-100	DS0
306	3	Lolovitali	Ts	Traditional - Short span	July	75-100	DS0
307	3	Lolovitali	Nb	Modern - R/Bblock	July	75-100	DS0
308	3	Lolovitali	Ts	Traditional - Short span	July	75-100	DS1
309	3	Lolovitali	Ts	Traditional - Short span	July	75-100	DS1
310	3	Lolovitali	Ts	Traditional - Short span	July	75-100	DS1
311	3	Lolovitali	Nt	Modern - Timber	July	75-100	DS0
312	3	Lolovitali	Ts	Traditional - Short span	July	75-100	DS1
313	3	Lolovitali	Ts	Traditional - Short span	July	75-100	DS0
314	3	Lolovitali	Ts	Traditional - Short span	July	75-100	DS1
315	3	Lolovitali	Nb	Modern - R/Bblock	July	75-100	DS0
316	3	Lolovele	Ts	Traditional - Short span	July	50-75	DS0
317	3	Lolovele	Ts	Traditional - Short span	July	50-75	DS5
318	3	Lolovele	Ts	Traditional - Short span	July	50-75	DS0
319	3	Lolovele	Ts	Traditional - Short span	July	50-75	DS0
320	3	Lolovele	Nb	Modern - R/Bblock	July	50-75	DS0
321	3	Lolovele	Ts	Traditional - Short span	July	50-75	DS0
322	3	Lolovele	Ts	Traditional - Short span	July	50-75	DS0
323	3	Lolovele	Ts	Traditional - Short span	July	50-75	DS0
324	3	Lolovele	Ts	Traditional - Short span	July	50-75	DS0
325	3	Lolovele	Ts	Traditional - Short span	July	50-75	DS0
326	3	Lolovele	Xw	Mixed wall construction	July	50-75	DS0
327	3	Lolovele	Ts	Traditional - Short span	July	50-75	DS5
328	3		Nb	Modern - R/Bblock	March/April	75-100	DS0
329	3		Nt	Modern - Timber	March/April	125-150	DS0
330	3		Ts	Traditional - Short span	March/April	125-150	DS2
331	3		Ts	Traditional - Short span	March/April	125-150	DS5
332	3		Ts	Traditional - Short span	March/April	125-150	DS0
333	3		X1	Trad. wall, Mod. roof	March/April	125-150	DS0
334	3		Ts	Traditional - Short span	March/April	125-150	DS0
335	3		Ts	Traditional - Short span	March/April	150-175	DS2
336	3		Ts	Traditional - Short span	March/April	150-175	DS5
337	3		Ts	Traditional - Short span	March/April	150-175	DS0
338	3		Ts	Traditional - Short span	March/April	150-175	DS1
339	3		Ts	Traditional - Short span	March/April	>175	DS1
340	3		Ts	Traditional - Short span	March/April	>175	DS1
341	3		Ts	Traditional - Short span	March/April	>175	DS5
342	3		Nb	Modern - R/Bblock	March/April	>175	DS1
343	3		Nb	Modern - R/Bblock	March/April	>175	DS0
344	3		Xw	Mixed wall construction	March/April	>175	DS0
345	3		Nb	Modern - R/Bblock	March/April	>175	DS1
346	3		Ts	Traditional - Short span	March/April	>175	DS0
347	3		Ts	Traditional - Short span	March/April	>175	DS1
348	3		Nb	Modern - R/Bblock	March/April	>175	DS0
349	3		Nb	Modern - R/Bblock	March/April	>175	DS0
350	3		Ts	Traditional - Short span	March/April	>175	DS0
351	3		Ts	Traditional - Short span	March/April	>175	DS0
352	3		Xw	Mixed wall construction	March/April	>175	DS0
353	3		Ts	Traditional - Short span	March/April	>175	DS0
354	3		Ts	Traditional - Short span	March/April	>175	DS0
355	3		Ts	Traditional - Short span	March/April	>175	DS0
356	3	Red Cliffs Airport	Ts	Traditional - Short span	March/April	>175	DS0
357	3	Red Cliffs Airport	Ts	Traditional - Short span	March/April	>175	DS3
358	3	Red Cliffs Airport	Ts	Traditional - Short span	March/April	>175	DS0
359	3	Red Cliffs Airport	Ts	Traditional - Short span	March/April	>175	DS5
360	3	Red Cliffs Airport	Ts	Traditional - Short span	March/April	>175	DS0
361	3	Red Cliffs Airport	X2	Trad. wall, Mod. roof	March/April	>175	DS0
362	3		Nt	Modern - Timber	N/A	50-75	DS0
363	3	Red Cliffs Harbour	Ts	Traditional - Short span	March/April	>175	DS5
364	3	Lolowai	Nt	Modern - Timber	July	<25	DS0
365	3	Lolowai	Nc	Modern - RC Pillar	July	<25	DS0
366	3	Lolowai	Nb	Modern - R/Bblock	July	<25	DS0
367	3	Lolowai	Nb	Modern - R/Bblock	July	<25	DS0
368	3	Lolowai	Nb	Modern - R/Bblock	July	<25	DS0
369	3	Lolowai	Nb	Modern - R/Bblock	July	<25	DS0
370	3	Lolowai	Nb	Modern - R/Bblock	July	<25	DS1
371	3	Lolowai	Nb	Modern - R/Bblock	July	<25	DS0
372	3	Lolowai	Nb	Modern - R/Bblock	July	<25	DS0
373	3	Lolowai	Nb	Modern - R/Bblock	July	<25	DS0
374	3	Lolowai	Nb	Modern - R/Bblock	July	<25	DS0
375	3	Lolowai	Xw	Mixed wall construction	July	<25	DS0
376	3	Lolowai	Nb	Modern - R/Bblock	July	<25	DS0
377	3	Lolowai	Nb	Modern - R/Bblock	July	<25	DS0
378	3	Lolowai	Nb	Modern - R/Bblock	July	<25	DS0
379	3	Lolowai	Nb	Modern - R/Bblock	July	<25	DS1
380	3	Lolowai	Xw	Mixed wall construction	July	<25	DS0
381	3	Lolowai	Xw	Mixed wall construction	July	<25	DS0
382	3	Lolowai	Xw	Mixed wall construction	July	<25	DS1
383	3	Lolowai	Xw	Mixed wall construction	July	<25	DS0
384	3	Lolowai	Xw	Mixed wall construction	July	<25	DS0
385	3	Lolowai	Nb	Modern - R/Bblock	July	<25	DS0
386	3	Lolowai	Nb	Modern - R/Bblock	July	<25	DS1
387	3	Lolowai	Nt	Modern - Timber	July	<25	DS0
388	3	Lolowai	Nb	Modern - R/Bblock	July	<25	DS0
389	3	Walaha Airport	Nc	Modern - RC Pillar	July	<25	DS0
390	3	Walaha Airport	Nb	Modern - R/Bblock	July	<25	DS0
391	3	Near Walaha	Xw	Mixed wall construction	July	<25	DS0
392	3	Near Walaha	Ts	Traditional - Short span	July	<25	DS0
393	3	Near Walaha	Ts	Traditional - Short span	July	<25	DS0
394	3	Near Walaha	Ts	Traditional - Short span	July	<25	DS0
395	3	Near Walaha	E	Temporary - Tents	July	<25	DS0
396	3	Near Walaha	E	Temporary - Tents	July	<25	DS0
397	3	Near Walaha	E	Temporary - Tents	July	<25	DS0
398	3	Near Walaha	E	Temporary - Tents	July	<25	DS0
399	3	Near Walaha	E	Temporary - Tents	July	<25	DS0
400	3	Near Walaha	E	Temporary - Tents	July	<25	DS0
401	3	Devil's Rock	Ts	Traditional - Short span	July	<25	DS0
402	3	Devil's Rock	X2	Trad. wall, Mod. roof	July	<25	DS0
403	3	Devil's Rock	Nb	Modern - R/Bblock	July	<25	DS0
404	3	Walaha school	Nb	Modern - R/Bblock	July	<25	DS0
405	3	Walaha school	Nb	Modern - R/Bblock	July	<25	DS0
406	3	Walaha school	Nb	Modern - R/Bblock	July	<25	DS0
407	3	Near Walaha	X1	Modern. walls, Trad. Roof	July	<25	DS0
408	3		Xw	Mixed wall construction	July	<25	DS0
409	3		Ts	Traditional - Short span	July	<25	DS0
410	3		E	Temporary - Tents	July	<25	DS0
411	3		E	Temporary - Tents	July	<25	DS0
412	3		E	Temporary - Tents	July	<25	DS0
413	3		E	Temporary - Tents	July	<25	DS0
414	3		Xw	Mixed wall construction	July	<25	DS0
415	3		Nt	Modern - Timber	July	<25	DS0
416	3		Nb	Modern - R/Bblock	July	25-50	DS0
417	3		Nt	Modern - Timber	July	25-50	DS0
418	3		Ts	Traditional - Short span	July	25-50	DS0
419	3		Nb	Modern - R/Bblock	July	25-50	DS0
420	3		Ts	Traditional - Short span	July	25-50	DS0
421	3		Xw	Mixed wall construction	July	25-50	DS0
422	3		Nb	Modern - R/Bblock	July	25-50	DS0
423	3		Ts	Traditional - Short span	July	25-50	DS0
424	3		Ts	Traditional - Short span	July	25-50	DS0
425	3	Longana Airport	Nb	Modern - R/Bblock	July	25-50	DS0
426	3		Nb	Modern - R/Bblock	July	50-75	DS0
427	3		Nb	Modern - R/Bblock	July	50-75	DS0
428	3		Xw	Mixed wall construction	July	50-75	DS0
429	3	Luvunvili	Xw	Mixed wall construction	July	50-75	DS1
430	3	Luvunvili	Xw	Mixed wall construction	July	50-75	DS0
431	3	Luvunvili	Xw	Mixed wall construction	July	50-75	DS0
432	3	Luvunvili	Nb	Modern - R/Bblock	July	50-75	DS1
433	3	Luvunvili	Ts	Traditional - Short span	July	50-75	DS0
434	3	Luvunvili	Ts	Traditional - Short span	July	50-75	DS1
435	3	Luvunvili	Nt	Modern - Timber	July	50-75	DS0
436	3	Luvunvili	Nb	Modern - R/Bblock	July	50-75	DS0
437	3	Luvunvili	Nb	Modern - R/Bblock	July	50-75	DS0
438	3	Luvunvili	Nb	Modern - R/Bblock	July	50-75	DS0
439	3	Luvunvili	Ts	Traditional - Short span	July	50-75	DS0
440	3	Luvunvili	Nt	Modern - Timber	July	50-75	DS0
441	3	Luvunvili	Ts	Traditional - Short span	July	50-75	DS1
442	3	Luvunvili	Ts	Traditional - Short span	July	50-75	DS0
443	3	Luvunvili	Nb	Modern - R/Bblock	July	50-75	DS2
444	3	Luvunvili	Nb	Modern - R/Bblock	July	50-75	DS1
445	3	Luvunvili	Nb	Modern - R/Bblock	July	50-75	DS0
446	3	Luvunvili	Xw	Mixed wall construction	July	50-75	DS0
447	3	Luvunvili	Xw	Mixed wall construction	July	50-75	DS2
448	3	Luvunvili	Ts	Traditional - Short span	July	50-75	DS0
449	3	Luvunvili	Xw	Mixed wall construction	July	50-75	DS1
450	3	Luvunvili	Ts	Traditional - Short span	July	50-75	DS1
451	3	Luvunvili	Ts	Traditional - Short span	July	50-75	DS1
452	3	Luvunvili	Xw	Mixed wall construction	July	50-75	DS1
453	3	Luvunvili	Ts	Traditional - Short span	July	50-75	DS0
454	3	Luvunvili	Xw	Mixed wall construction	July	50-75	DS0
455	3	Luvunvili	Ts	Traditional - Short span	July	50-75	DS1
456	3	Luvunvili	Xw	Mixed wall construction	July	50-75	DS0
457	3	Luvunvili	Nb	Modern - R/Bblock	July	50-75	DS0
458	3	Luvunvili	Xw	Mixed wall construction	July	50-75	DS0
459	3	Luvunvili	Xw	Mixed wall construction	July	50-75	DS0
460	3	Luvunvili	Ts	Traditional - Short span	July	50-75	DS0
461	3	Luvunvili	Ts	Traditional - Short span	July	50-75	DS0
462	3	Luvunvili	Ts	Traditional - Short span	July	50-75	DS1
463	3	Luvunvili	Ts	Traditional - Short span	July	50-75	DS5
464	3	Luvunvili	Ts	Traditional - Short span	July	50-75	DS1
465	3	Luvunvili	Nb	Modern - R/Bblock	July	50-75	DS0
466	3	Luvunvili	Nb	Modern - R/Bblock	July	50-75	DS0
467	3	Luvunvili	Nb	Modern - R/Bblock	July	50-75	DS0
468	3	Luvunvili	Nb	Modern - R/Bblock	July	50-75	DS0
469	3	Luvunvili	Ts	Traditional - Short span	July	50-75	DS2
470	3	Luvunvili	Xw	Mixed wall construction	July	50-75	DS2
471	3	Luvunvili	Ts	Traditional - Short span	July	50-75	DS0
472	3	Luvunvili	Ts	Traditional - Short span	July	50-75	DS2
473	3	Luvunvili	Ts	Traditional - Short span	July	50-75	DS1
474	3	Luvunvili	Nb	Modern - R/Bblock	July	50-75	DS1
475	3	Luvunvili	Nb	Modern - R/Bblock	July	50-75	DS1
476	3	Luvunvili	Nb	Modern - R/Bblock	July	50-75	DS0
477	3	Luvunvili	Nb	Modern - R/Bblock	July	50-75	DS0
478	3	Lovunikatambolo	X1	Modern. walls, Trad. Roof	July	50-75	DS1
479	3	Lovunikatambolo	Ts	Traditional - Short span	July	50-75	DS5
480	3	Lovunikatambolo	Ts	Traditional - Short span	July	50-75	DS1
481	3	Lovunikatambolo	Ts	Traditional - Short span	July	50-75	DS1
482	3	Lovunikatambolo	Nb	Modern - R/Bblock	July	50-75	DS0
483	3	Lovunikatambolo	Xw	Mixed wall construction	July	50-75	DS1
484	3	Lovunikatambolo	Xw	Mixed wall construction	July	50-75	DS0
485	3	Sarabulu	X2	Trad. wall, Mod. roof	July	125-150	DS1
486	3	Sarabulu	Nb	Modern - R/Bblock	July	125-150	DS0
487	3	Sarabulu	Ts	Traditional - Short span	July	125-150	DS2
488	3	Sarabulu	Ts	Traditional - Short span	July	125-150	DS2
489	3	Sarabulu	X2	Trad. wall, Mod. roof	July	125-150	DS5
490	3	Sarabulu	Ts	Traditional - Short span	July	125-150	DS1
491	3	Sarabulu	Xw	Mixed wall construction	July	125-150	DS1
492	3	Sarabulu	Ts	Traditional - Short span	July	125-150	DS1
493	3	Sarabulu	Ts	Traditional - Short span	July	125-150	DS5
494	3	Sarabulu	Ts	Traditional - Short span	July	125-150	DS5
495	3	Sarabulu	Xw	Mixed wall construction	July	125-150	DS0
496	3	Sarabulu	Ts	Traditional - Short span	July	125-150	DS1
497	3	Sarabulu	To	Traditional - Shower/toilet	July	125-150	DS0
498	3	Sarabulu	Nb	Modern - R/Bblock	July	125-150	DS0
499	3	Sarabulu	Nb	Modern - R/Bblock	July	125-150	DS0
500	3	Sarabulu	Ts	Traditional - Short span	July	125-150	DS0
501	3	Sarabulu	Ts	Traditional - Short span	July	125-150	DS0
502	3	Sarabulu	Xw	Mixed wall construction	July	125-150	DS2
503	3	Sarabulu	Ts	Traditional - Short span	July	125-150	DS5
504	3	Sarabulu	X2	Trad. wall, Mod. roof	July	125-150	DS3
505	3	Sarabulu	Ts	Traditional - Short span	July	125-150	DS5
506	3	Sarabulu	Ts	Traditional - Short span	July	100-125	DS1
507	3	Luvunvili	Ts	Traditional - Short span	July	50-75	DS0
508	3	Luvunvili	Ts	Traditional - Short span	July	50-75	DS5
509	3	Luvunvili	Ts	Traditional - Short span	July	50-75	DS1
510	3	Devil's Rock	Nt	Modern - Timber	July	<25	DS0
511	3	Devil's Rock	Nb	Modern - R/Bblock	July	<25	DS0
512	3	Walaha school	Nb	Modern - R/Bblock	July	<25	DS0
513	3	Lo One	Ts	Traditional - Short span	July	<25	DS0
514	3	Lo One	Nt	Modern - Timber	July	25-50	DS1
515	3	Lo One	Ts	Traditional - Short span	July	25-50	DS1
516	3	Lo One	Nb	Modern - R/Bblock	July	25-50	DS0
517	3	Lo One	Xw	Mixed wall construction	July	25-50	DS0
518	3	Lo One	Ts	Traditional - Short span	July	25-50	DS0
519	3	Lo One	Ts	Traditional - Short span	July	25-50	DS0
520	3	Lo One	Nb	Modern - R/Bblock	July	25-50	DS1
521	3	Lo One	E	Temporary - Tents	July	25-50	DS1
522	3	Lo One	Nt	Modern - Timber	July	25-50	DS3
523	3	Lo One	Xw	Mixed wall construction	July	25-50	DS1
524	3	Lo One	Nt	Modern - Timber	July	25-50	DS2
525	3	Lo One	Ts	Traditional - Short span	July	25-50	DS1
526	3	Lo One	Xw	Mixed wall construction	July	25-50	DS0
527	3	Lo One	Nb	Modern - R/Bblock	July	25-50	DS1
528	3	Lo One	Nb	Modern - R/Bblock	July	25-50	DS1
529	3	Lo One	E	Temporary - Tents	July	25-50	DS2
530	3	Lo One	E	Temporary - Tents	July	25-50	DS1
531	3	Lo One	Ts	Traditional - Short span	July	25-50	DS0
532	3	Lolobinanungwe	Xw	Mixed wall construction	March/April	25-50	DS0
533	3	Lolobinanungwe	X2	Trad. wall, Mod. roof	March/April	25-50	DS0
534	3	Lolobinanungwe	Nt	Modern - Timber	March/April	25-50	DS0
535	3	Lolobinanungwe	Xw	Mixed wall construction	March/April	50-75	DS0
536	3	Lolobinanungwe	Nt	Modern - Timber	March/April	50-75	DS0
537	3	Lolobinanungwe	Xw	Mixed wall construction	July	25-50	DS1
538	3	Lolobinanungwe	Ts	Traditional - Short span	March/April	50-75	DS0
539	3	Lolobinanungwe	X2	Trad. wall, Mod. roof	March/April	50-75	DS2
540	3	Lolobinanungwe	Ts	Traditional - Short span	March/April	50-75	DS1
541	3	Lolobinanungwe	Ts	Traditional - Short span	March/April	50-75	DS0
542	3	Lolobinanungwe	Ts	Traditional - Short span	March/April	50-75	DS5
543	3	Lolobinanungwe	Nb	Modern - R/Bblock	March/April	50-75	DS0
544	3	Lolobinanungwe	X2	Trad. wall, Mod. roof	March/April	50-75	DS5
545	3	Lolobinanungwe	Ts	Traditional - Short span	March/April	50-75	DS1
546	3	Lolobinanungwe	Ts	Traditional - Short span	March/April	50-75	DS5
547	3	Lolobinanungwe	Ts	Traditional - Short span	July	25-50	DS3
548	3		Nb	Modern - R/Bblock	March/April	25-50	DS0
549	3		Nt	Modern - Timber	March/April	25-50	DS0
550	3		Nb	Modern - R/Bblock	March/April	25-50	DS0
551	3		Xw	Mixed wall construction	March/April	25-50	DS2
552	3		Ts	Traditional - Short span	March/April	25-50	DS1
553	3		Xw	Mixed wall construction	March/April	25-50	DS5
554	3		Nt	Modern - Timber	March/April	25-50	DS1
555	3		Ts	Traditional - Short span	March/April	25-50	DS0
556	3		Nb	Modern - R/Bblock	March/April	25-50	DS0
557	3		Nt	Modern - Timber	March/April	25-50	DS0
558	3	Vinanungue	Ts	Traditional - Short span	March/April	50-75	DS0
559	3	Vinanungue	Nt	Modern - Timber	March/April	50-75	DS0
560	3	Vinanungue	Nt	Modern - Timber	July	<25	DS1
561	3	Vinanungue	Ts	Traditional - Short span	March/April	50-75	DS5
562	3	Vinanungue	Xw	Mixed wall construction	March/April	50-75	DS2
563	3	Vinanungue	Ts	Traditional - Short span	March/April	50-75	DS0
564	3	Vinanungue	Ts	Traditional - Short span	March/April	50-75	DS3
565	3	Vinanungue	Ts	Traditional - Short span	March/April	50-75	DS1
566	3	Vinanungue	Ts	Traditional - Short span	March/April	50-75	DS1
567	3	Vinanungue	Nb	Modern - R/Bblock	March/April	50-75	DS0
568	3	Vinanungue	Ts	Traditional - Short span	March/April	50-75	DS1
569	3	Vinanungue	Nb	Modern - R/Bblock	March/April	50-75	DS0
570	3	Vinanungue	Ts	Traditional - Short span	March/April	50-75	DS0
571	3	Vinanungue	X2	Trad. wall, Mod. roof	March/April	50-75	DS0
572	3	Vinanungue	X1	Modern. walls, Trad. Roof	March/April	50-75	DS0
573	3	Vinanungue	Ts	Traditional - Short span	March/April	50-75	DS0
574	3	Lomaki	Nb	Modern - R/Bblock	March/April	25-50	DS0
575	3	Lomaki	Nb	Modern - R/Bblock	March/April	25-50	DS0
576	3	Lomaki	Nb	Modern - R/Bblock	March/April	25-50	DS1
577	3	Lomaki	Nt	Modern - Timber	March/April	25-50	DS1
578	3	Lomaki	Nt	Modern - Timber	March/April	25-50	DS2
579	3	Lomaki	Nb	Modern - R/Bblock	March/April	25-50	DS0
580	3	Lomaki	Nt	Modern - Timber	March/April	25-50	DS3
581	3	Lomaki	X1	Modern. walls, Trad. Roof	March/April	25-50	DS0
582	3	Ndui Ndui Health centre	Xw	Mixed wall construction	March/April	25-50	DS0
584	3	Ndui Ndui Health centre	Nt	Modern - Timber	March/April	25-50	DS0
585	3	Ndui Ndui Health centre	Nt	Modern - Timber	March/April	25-50	DS1
586	3	Ndui Ndui Health centre	Xw	Mixed wall construction	March/April	25-50	DS0
587	3	Ndui Ndui Health centre	Xw	Mixed wall construction	March/April	25-50	DS1
588	3	Ndui Ndui Health centre	Xw	Mixed wall construction	March/April	25-50	DS2
589	3		Nb	Modern - R/Bblock	March/April	<25	DS0
590	3		Nb	Modern - R/Bblock	July	<25	DS1
591	3	Catholic Mission	Ts	Traditional - Short span	March/April	25-50	DS5
592	3	Catholic Mission	Ts	Traditional - Short span	March/April	25-50	DS0
593	3	Catholic Mission	Nb	Modern - R/Bblock	March/April	25-50	DS0
